# Supplementary material for: The Maturing Development of Gut Microbiota in Commercial Piglets during the Weaning Transition
Source: PubMed Central journal article supplement (PMC5591375; doi:10.3389/fmicb.2017.01688), 2017-09-04
Supplement: Presentation_1.pdf [file Presentation_1.pdf]

Supplementary Material

The Maturing Development of Gut Microbiota in Commercial Piglets during the Weaning Transition

Limei Chen, Yuesong Xu, Xiaoyu Chen, Chao Fang, Liping Zhao, Feng Chen\*

\* Correspondence: Feng Chen: cf2001@sjtu.edu.cn

1 Supplementary Figures and Tables

1.1 Supplementary Figures

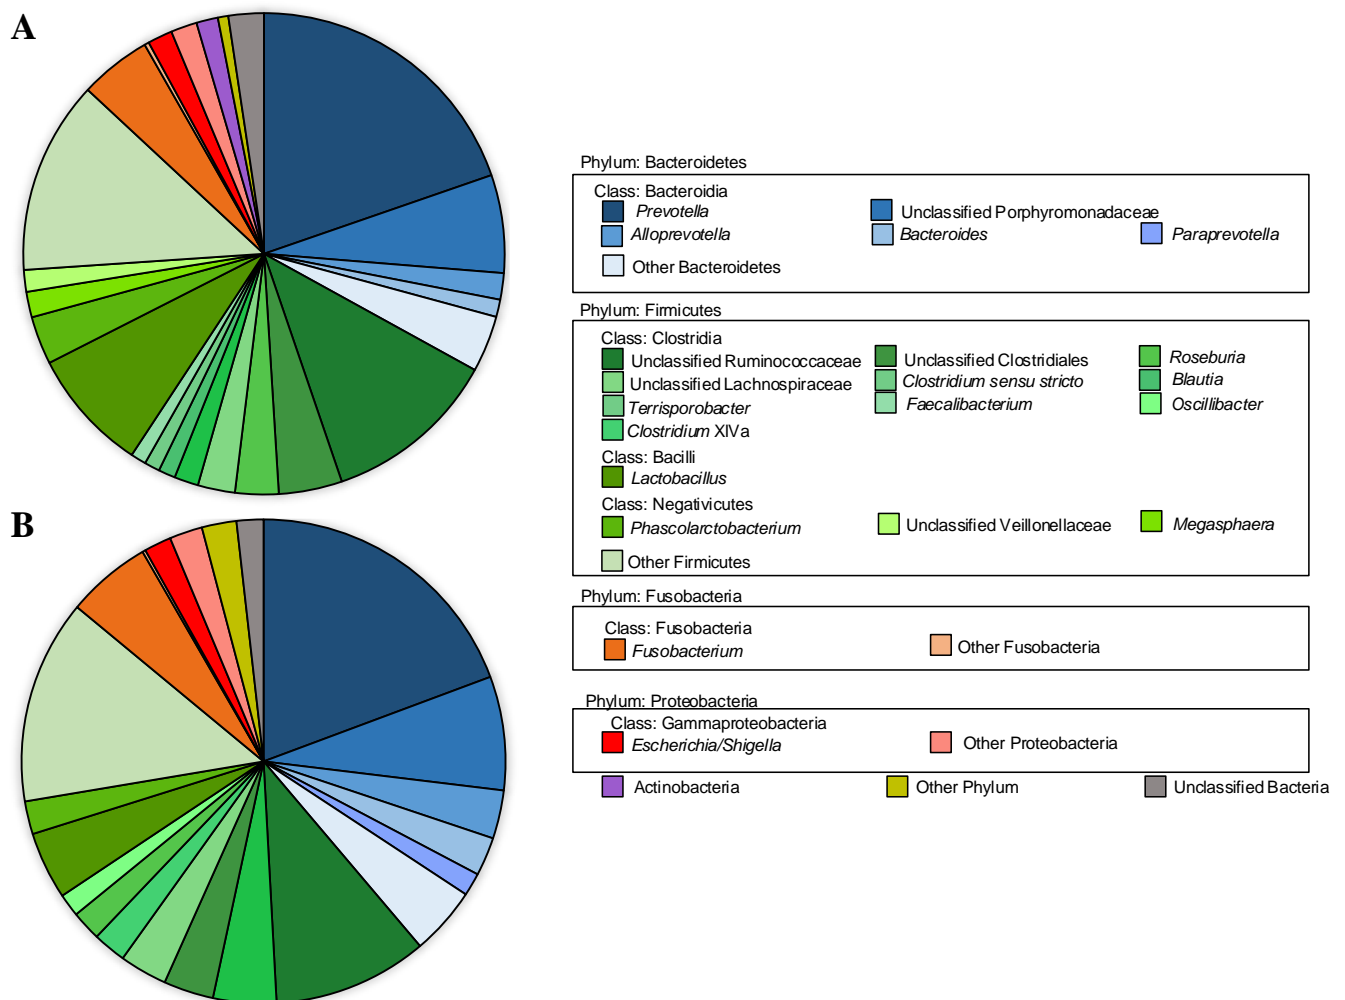

Supplementary Figure 1. Genus-level gut microbiota composition of the piglets. (A) The dominant genera in the 32 fecal samples of 8 piglets in T1. (B) The dominant genera in the 36 fecal samples of 9 piglets in T2.

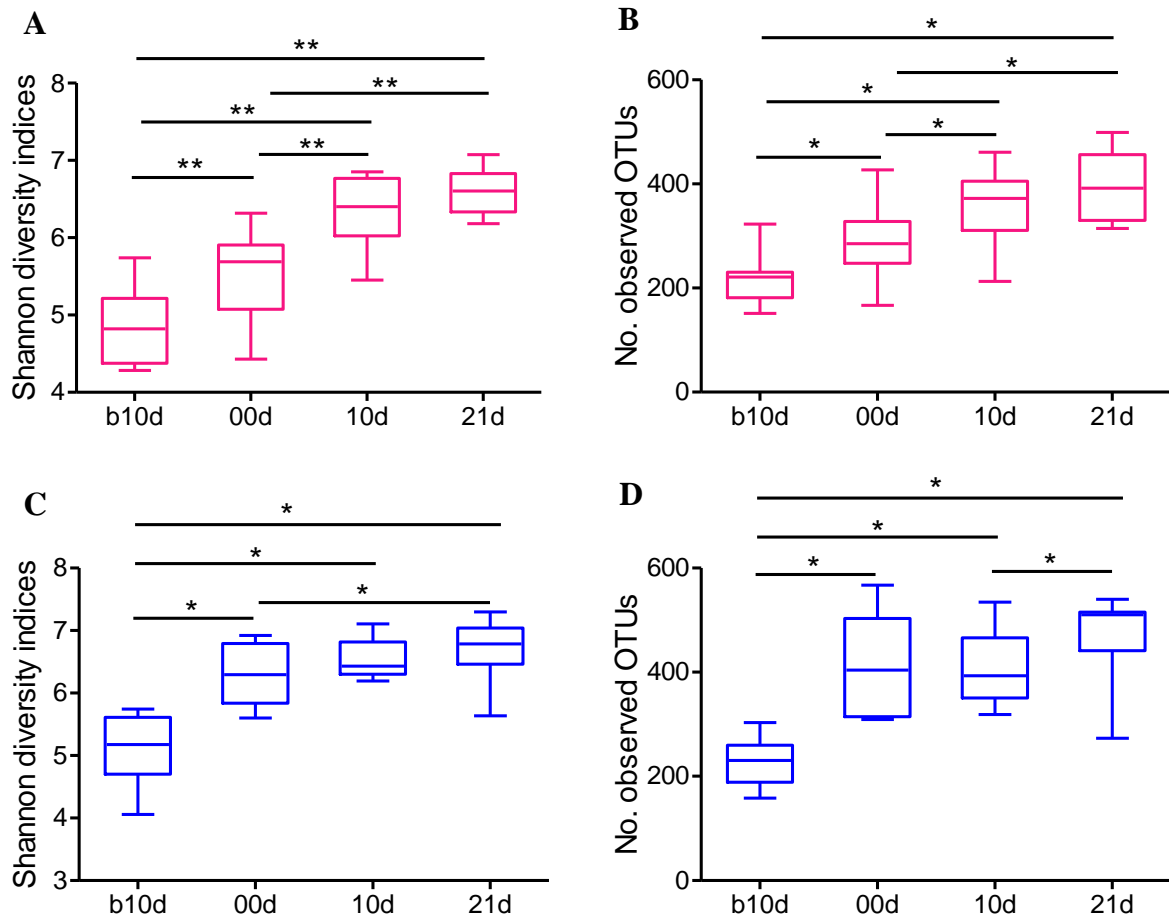

**Supplementary Figure 2. Variations in alpha diversity of the piglets.** (A) Comparisons of Shannon diversity indices between different age piglets in T1. (B) Comparisons of the number of observed OTUs between different age piglets in T1. (C) Comparisons of Shannon diversity indices between different age piglets in T2. (D) Comparisons of the number of observed OTUs between different age piglets in T2. All comparisons were tested by paired sample Wilcoxon signed-rank test and adjusted with FDR. Both alpha diversity metrics were calculated upon the rarified OTU subsets, using 13000 sequences per sample with 1,000 replications. In all panels, boxes represent the interquartile range (IQR) between the first and third quartiles. The lines inside boxes represent the median. Whiskers denote the lowest and highest values within 1.5 IQR from the first and third quartiles, respectively. Sample size: n=8 in T1, n=9 in T2. \*,  $P < 0.05$ ; \*\*,  $P < 0.01$ ; \*\*\*,  $P < 0.001$ .

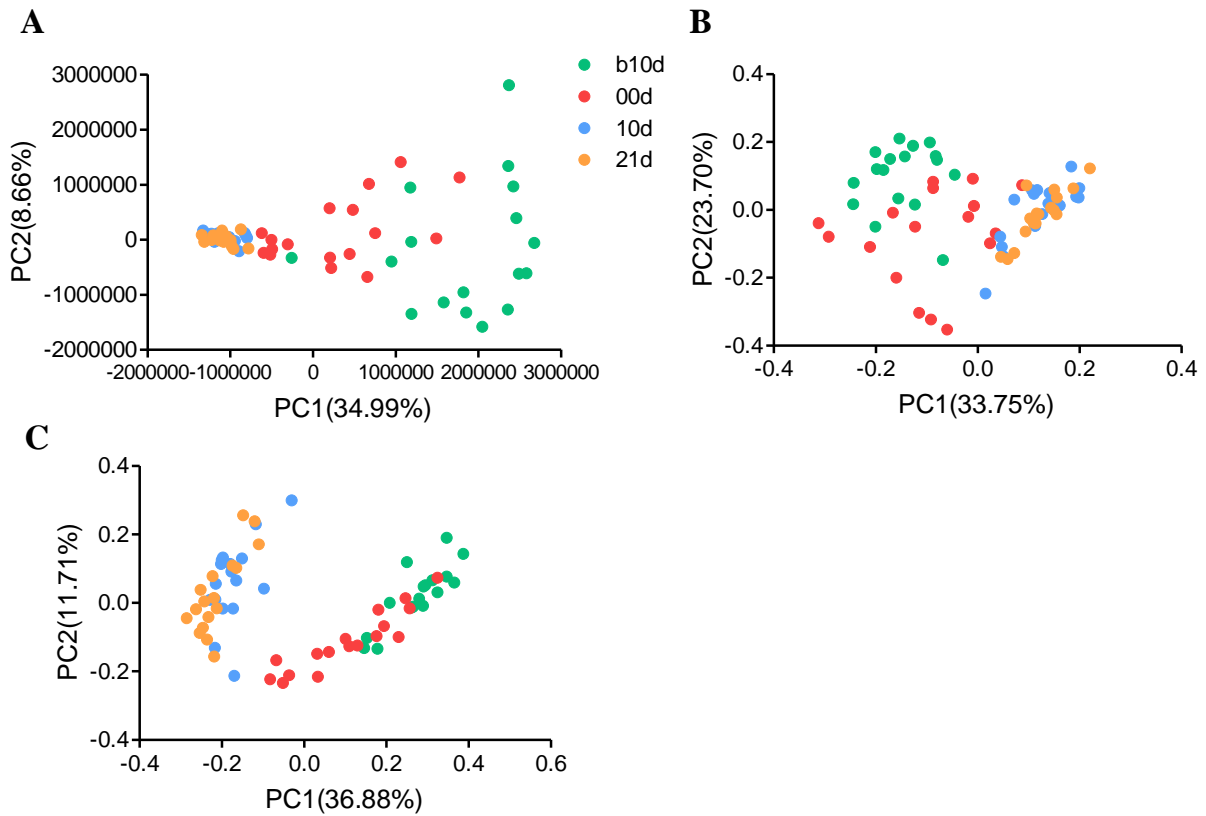

**Supplementary Figure 3. Trajectory of the gut microbiota structure of each piglet across age based on other distances. (A) PCA. (B) PCoA plots based on weighted UniFrac distance. (C) PCoA plots based on unweighted UniFrac distance.**

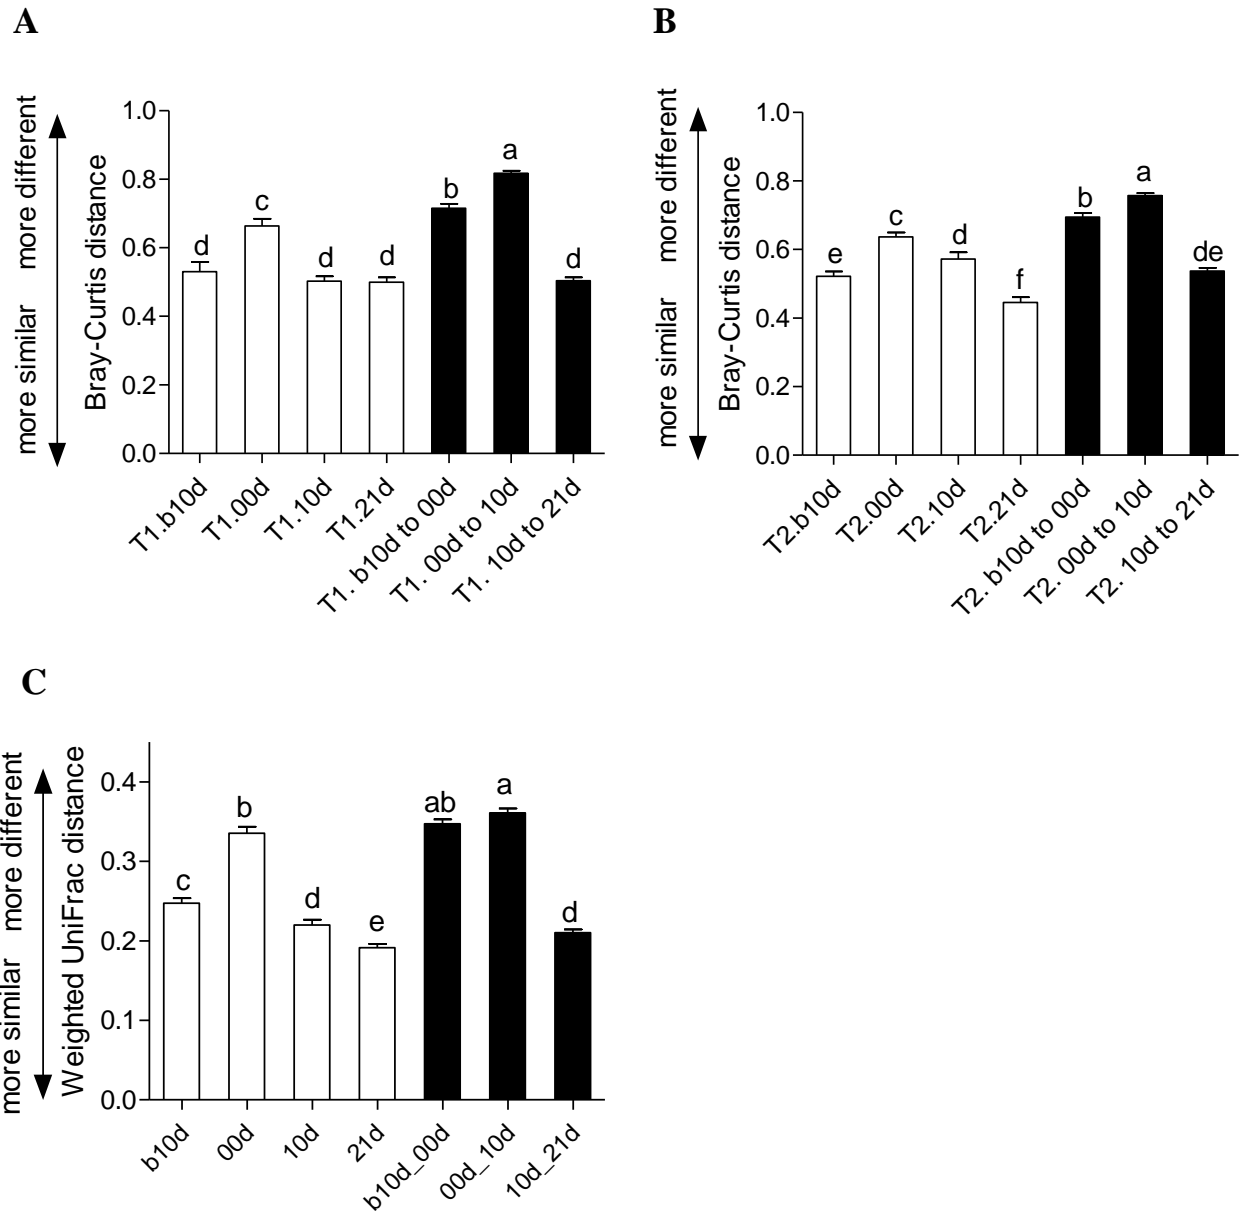

**Supplementary Figure 4. Inter- and intraindividual variations of the gut microbiota of the piglets.**

(A) Inter- and intraindividual variations of the gut microbiota based on Bray-Curtis distance in T1. (B) Inter- and intraindividual variations of the gut microbiota based on Bray-Curtis distance in T2. (C) Inter- and intraindividual variations of the gut microbiota based on weighted UniFrac distance in all piglets. Mean values  $\pm$ s.e.m are shown. Different letters above the bar denotes significant difference tested by Student's *t*-test with 1,000 Monte Carlo permutations.

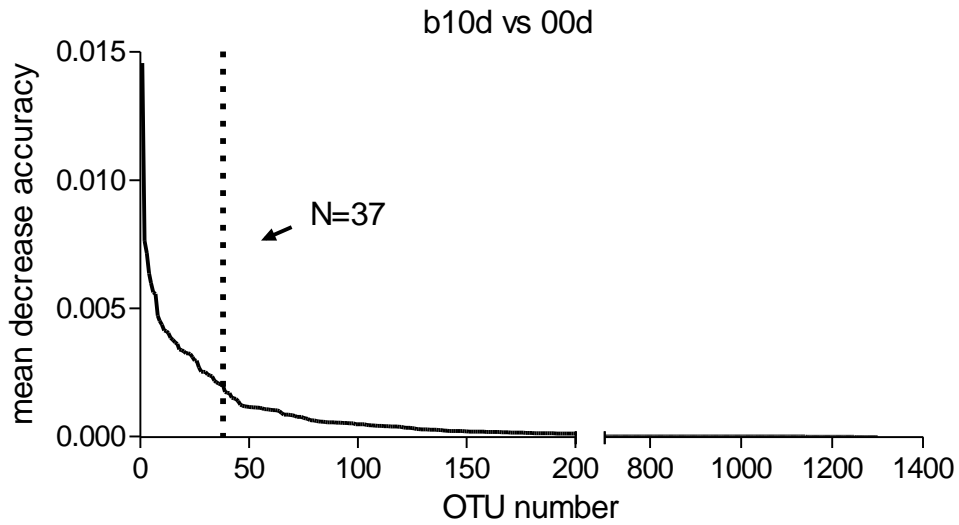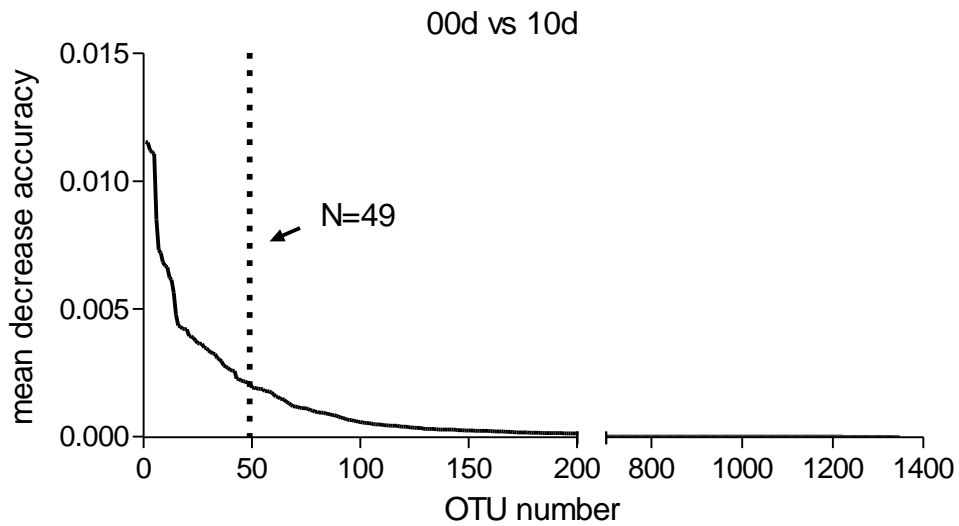

**Supplementary Figure 5.** 85 key OTUs were identified by applying Random Forest classification of their relative abundances in fecal samples, ranked in descending order of their feature accuracy of the models. N is the number of OTUs without which the accuracy of the model will decrease more than 0.2%. The 85 OTUs was the combination of N from 2 models.

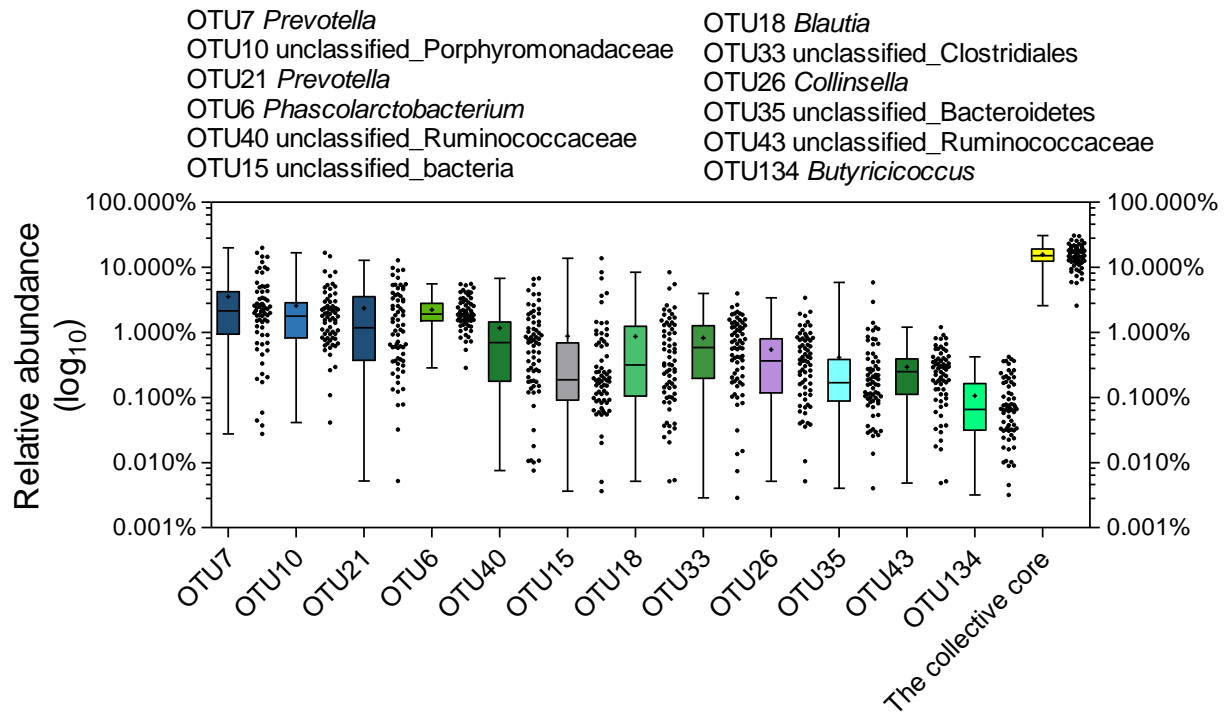

**Supplementary Figure 6. The abundance distribution of the 12 OTUs and the collective core.** Boxes represent the interquartile range (IQR) between the first and third quartiles. The lines and spots inside boxes represent the median and mean, respectively. Whiskers denote the lowest and highest values within  $1.5 \times \text{IQR}$  from the first and third quartiles, respectively.

## 1.2 Supplementary Tables

**Supplementary Table 1. Ingredient and nutritional value analysis of basal diet.**

| Item                       | Ingredient (%) |
|----------------------------|----------------|
| Corn, yellow               | 56.50          |
| Soybean meal               | 10.00          |
| fermented soybean meal     | 6.00           |
| extruded soybean           | 8.00           |
| Fish meal                  | 2.50           |
| Dried whey                 | 5.00           |
| Good strong peptide        | 2.00           |
| Glucose                    | 2.50           |
| Dicalcium phosphate        | 1.00           |
| Limestone                  | 0.50           |
| salad oil                  | 2.00           |
| Premix feed <sup>a</sup>   | 4.00           |
| Nutritional value analysis |                |
| ME. Mcal/kg)               | 3.452          |
| CP (%)                     | 18.872         |
| Lys (%)                    | 1.381          |
| Met (%)                    | 0.566          |
| Met+Cys(%)                 | 0.838          |
| Thr(%)                     | 0.890          |
| Trp(%)                     | 0.253          |
| Ca (%)                     | 0.711          |
| P (%)                      | 0.612          |

a: Provided the following per kg of diet: rice bran power carrier 19.9g, Micro mineral package 3g, zinc oxide 2.5g, salt 3g, Lysine(98.5%) 4.5g, Methionine(99%) 2.7g, Threonine(98.5%) 1.5g, Tryptophan(98%) 0.4g, choline chloride(50%) 2g, Vitamin 0.5g.

**Supplementary Table 2. Impact of age on segregation of gut microbiota during suckling and weaning period.**

| Items               | Bray Curtis ( $P^a$ -value) | Weighted UniFrac ( $P^b$ -value) |
|---------------------|-----------------------------|----------------------------------|
| b10d <i>VS.</i> 00d | 0.00012                     | 0.00012                          |
| b10d <i>VS.</i> 10d | 0.00012                     | 0.00012                          |
| b10d <i>VS.</i> 21d | 0.00012                     | 0.00012                          |
| 00d <i>VS.</i> 10d  | 0.00012                     | 0.00012                          |
| 00d <i>VS.</i> 21d  | 0.00012                     | 0.00012                          |
| 10d <i>VS.</i> 21d  | 0.0623                      | 0.1646                           |

a: PERMANOVA test based on Bray-Curtis distance of samples followed by FDR adjustment.

b: PERMANOVA test based on weighted UniFrac distance of samples followed by FDR adjustment.

**Supplementary Table 3. Leave one out cross validation estimated error and baseline error of Random Forest models of each group paired.**

| Items               | Estimated error | Baseline error | Ratio baseline error to estimated error |
|---------------------|-----------------|----------------|-----------------------------------------|
| b10d <i>VS.</i> 00d | 0.02941         | 0.5            | 17                                      |
| 00d <i>VS.</i> 10d  | 0               | 0.5            | Inf                                     |



**Supplementary Table 4. Taxonomy and dynamics information of 85 key OTUs.**

| OUT_ID  | CAG group | Phylum         | Family                | Genus                                 | b10d to 00d( $P^a$ - value) | 00d to 10d( $P^b$ -value) | b10d to 10d( $P^c$ -value) |
|---------|-----------|----------------|-----------------------|---------------------------------------|-----------------------------|---------------------------|----------------------------|
| OTU101  | 1         | Firmicutes     | Ruminococcaceae       | <i>Butyricicoccus</i>                 | 0.25                        | 0.00127 * ↑               | 0.00088 * ↑                |
| OTU83   | 1         | Firmicutes     | Ruminococcaceae       | <i>Butyricicoccus</i>                 | 0.375                       | 0.00044 * ↑               | 0.00044 * ↑                |
| OTU161  | 1         | Firmicutes     | Lachnospiraceae       | <i>Lachnospiraceae_incertae_sedis</i> | 0.0625                      | 0.00044 * ↑               | 0.00044 * ↑                |
| OTU179  | 1         | Bacteroidetes  | Prevotellaceae        | <i>Prevotella</i>                     | 0.3125                      | 0.00053 * ↑               | 0.00053 * ↑                |
| OTU254  | 1         | Firmicutes     | Clostridiaceae 1      | <i>Clostridium sensu stricto</i>      | 1                           | 0.0009 * ↑                | 0.00088 * ↑                |
| OTU145  | 1         | Firmicutes     | Ruminococcaceae       | <i>Clostridium IV</i>                 | 0.07813                     | 0.00075 * ↑               | 0.00075 * ↑                |
| OTU16   | 1         | Firmicutes     | Lactobacillaceae      | <i>Lactobacillus</i>                  | 0.00391 * ↑                 | 0.00044 * ↑               | 0.00044 * ↑                |
| OTU29   | 1         | Firmicutes     | Ruminococcaceae       |                                       | 0.01563 * ↑                 | 0.00044 * ↑               | 0.00044 * ↑                |
| OTU56   | 1         | Bacteroidetes  | Prevotellaceae        | <i>Prevotella</i>                     | 0.03125 * ↑                 | 0.00044 * ↑               | 0.00044 * ↑                |
| OTU61   | 1         | Bacteroidetes  | Prevotellaceae        | <i>Prevotella</i>                     | 0.00391 * ↑                 | 0.00044 * ↑               | 0.00044 * ↑                |
| OTU1206 | 1         | Bacteroidetes  | Prevotellaceae        | <i>Prevotella</i>                     | 1                           | 0.00066 * ↑               | 0.00066 * ↑                |
| OTU535  | 1         | Bacteroidetes  | Prevotellaceae        | <i>Prevotella</i>                     | 1                           | 0.00009 * ↑               | 0.00009 * ↑                |
| OTU1268 | 1         | Bacteroidetes  | Prevotellaceae        | <i>Prevotella</i>                     | 1                           | 0.00009 * ↑               | 0.00009 * ↑                |
| OTU651  | 1         | Bacteroidetes  | Prevotellaceae        | <i>Prevotella</i>                     | 0.3125                      | 0.00063 * ↑               | 0.00063 * ↑                |
| OTU173  | 1         | Firmicutes     |                       |                                       | 0.25                        | 0.00066 * ↑               | 0.00066 * ↑                |
| OTU844  | 1         | Firmicutes     |                       |                                       | 0.5                         | 0.0021 * ↑                | 0.00131 * ↑                |
| OTU177  | 1         | Firmicutes     | Ruminococcaceae       |                                       | 0.3125                      | 0.00075 * ↑               | 0.00075 * ↑                |
| OTU210  | 1         | Actinobacteria | Coriobacteriaceae     | <i>Olsenella</i>                      | 0.3125                      | 0.00096 * ↑               | 0.00096 * ↑                |
| OTU1230 | 1         | Firmicutes     | Ruminococcaceae       |                                       | 0.01172 * ↑                 | 0.00044 * ↑               | 0.00044 * ↑                |
| OTU668  | 1         | Firmicutes     | Peptostreptococcaceae | <i>Clostridium XI</i>                 | 0.06738                     | 0.00066 * ↑               | 0.00066 * ↑                |
| OTU215  | 1         | Firmicutes     | Lachnospiraceae       | <i>Lachnospiraceae_incertae_sedis</i> | 0.00684 * ↑                 | 0.00107 * ↑               | 0.00088 * ↑                |
| OTU216  | 1         | Firmicutes     | Lachnospiraceae       | <i>Lachnospiraceae_incertae_sedis</i> | 0.03906 * ↑                 | 0.00044 * ↑               | 0.00044 * ↑                |
| OTU122  | 1         | Bacteroidetes  | Prevotellaceae        | <i>Prevotella</i>                     | 0.96973                     | 0.0009 * ↑                | 0.0009 * ↑                 |
| OTU24   | 1         | Bacteroidetes  | Prevotellaceae        | <i>Prevotella</i>                     | 0.16257                     | 0.00075 * ↑               | 0.00075 * ↑                |
| OTU54   | 1         | Bacteroidetes  | Prevotellaceae        | <i>Prevotella</i>                     | 0.33183                     | 0.00044 * ↑               | 0.00044 * ↑                |
| OTU19   | 1         | Bacteroidetes  | Prevotellaceae        | <i>Prevotella</i>                     | 0.19299                     | 0.00107 * ↑               | 0.00088 * ↑                |
| OTU104  | 2         | Firmicutes     | Lachnospiraceae       | <i>Dorea</i>                          | 0.00063 * ↑                 | 0.83131                   | 0.00063 * ↑                |
| OTU98   | 2         | Actinobacteria | Coriobacteriaceae     |                                       | 0.00063 * ↑                 | 0.75831                   | 0.00063 * ↑                |
| OTU205  | 2         | Firmicutes     | Lachnospiraceae       | <i>Clostridium XIVb</i>               | 0.00127 * ↑                 | 0.09286                   | 0.00127 * ↑                |
| OTU456  | 2         | Bacteroidetes  | Bacteroidaceae        | <i>Bacteroides</i>                    | 0.00146 * ↑                 | 0.63867                   | 0.00146 * ↑                |
| OTU268  | 2         | Firmicutes     | Lachnospiraceae       |                                       | 0.00406 * ↑                 | 0.67912                   | 0.00406 * ↑                |

| OUT_ID  | CAG group | Phylum         | Family              | Genus                        | b10d to 00d( $P^a$ - value) | 00d to 10d( $P^b$ -value) | b10d to 10d( $P^c$ -value) |
|---------|-----------|----------------|---------------------|------------------------------|-----------------------------|---------------------------|----------------------------|
| OTU230  | 2         | Bacteroidetes  |                     |                              | 0.00037 * ↑                 | 0.12054                   | 0.00586 * ↑                |
| OTU256  | 2         | Bacteroidetes  | Porphyromonadaceae  |                              | 0.00018 * ↑                 | 0.04791 * ↓               | 0.01007 * ↑                |
| OTU350  | 2         | Bacteroidetes  | Prevotellaceae      | <i>Paraprevotella</i>        | 0.00073 * ↑                 | 0.08325                   | 0.03223 * ↑                |
| OTU94   | 2         | Bacteroidetes  | Bacteroidaceae      | <i>Bacteroides</i>           | 0.00131 * ↑                 | 0.00241 * ↓               | 0.16882                    |
| OTU1053 | 3         | Bacteroidetes  | Prevotellaceae      | <i>Prevotella</i>            | 0.0011 * ↑                  | 0.01682 * ↑               | 0.0011 * ↑                 |
| OTU53   | 3         | Firmicutes     | Streptococcaceae    | <i>Streptococcus</i>         | 0.0014 * ↑                  | 0.0014 * ↑                | 0.00088 * ↑                |
| OTU1191 | 3         | Firmicutes     | Ruminococcaceae     |                              | 0.01007 * ↑                 | 0.79459                   | 0.01007 * ↑                |
| OTU23   | 3         | Firmicutes     | Lachnospiraceae     | <i>Clostridium XIVa</i>      | 0.00096 * ↑                 | 0.05521                   | 0.00096 * ↑                |
| OTU44   | 3         | Firmicutes     | Lachnospiraceae     | <i>Coprococcus</i>           | 0.0029 * ↑                  | 0.01912 * ↑               | 0.0018 * ↑                 |
| OTU170  | 3         | Actinobacteria | Coriobacteriaceae   | <i>Senegalimassilia</i>      | 0.00073 * ↑                 | 0.08402                   | 0.00073 * ↑                |
| OTU914  | 3         | Firmicutes     | Lachnospiraceae     | <i>Blautia</i>               | 0.0014 * ↑                  | 0.02772 * ↑               | 0.00088 * ↑                |
| OTU62   | 3         | Firmicutes     | Lachnospiraceae     | <i>Ruminococcus2</i>         | 0.02454 * ↑                 | 0.00540 * ↑               | 0.00088 * ↑                |
| OTU58   | 3         | Firmicutes     | Ruminococcaceae     | <i>Faecalibacterium</i>      | 0.16257                     | 0.00063 * ↑               | 0.00063 * ↑                |
| OTU1244 | 3         | Firmicutes     | Acidaminococcaceae  | <i>Phascolarctobacterium</i> | 0.00127 * ↑                 | 0.09286                   | 0.00088 * ↑                |
| OTU185  | 3         | Firmicutes     | Lachnospiraceae     | <i>Clostridium XIVa</i>      | 0.00127 * ↑                 | 0.83131                   | 0.00105 * ↑                |
| OTU136  | 3         | Bacteroidetes  |                     |                              | 0.00481 * ↑                 | 0.43476                   | 0.00481 * ↑                |
| OTU160  | 3         | Firmicutes     | Ruminococcaceae     | <i>Butyricicoccus</i>        | 0.00073 * ↑                 | 0.14766                   | 0.00018 * ↑                |
| OTU706  | 3         | Firmicutes     | Lachnospiraceae     |                              | 0.00037 * ↑                 | 0.13538                   | 0.00037 * ↑                |
| OTU246  | 3         | Firmicutes     | Erysipelotrichaceae |                              | 0.00073 * ↑                 | 0.83131                   | 0.00073 * ↑                |
| OTU286  | 3         | Firmicutes     | Lachnospiraceae     |                              | 0.00044 * ↑                 | 0.00044 * ↑               | 0.00044 * ↑                |
| OTU1    | 4         | Firmicutes     | Lactobacillaceae    | <i>Lactobacillus</i>         | 0.09286                     | 0.00044 * ↓               | 0.00044 * ↓                |
| OTU214  | 4         | Firmicutes     | Veillonellaceae     | <i>Mitsuokella</i>           | 0.00973 * ↑                 | 0.00116 * ↓               | 0.00116 * ↓                |
| OTU11   | 4         | Firmicutes     | Veillonellaceae     | <i>Megasphaera</i>           | 0.03947 * ↓                 | 0.00044 * ↓               | 0.00044 * ↓                |
| OTU988  | 4         | Firmicutes     | Veillonellaceae     | <i>Megasphaera</i>           | 0.08402                     | 0.00044 * ↓               | 0.00044 * ↓                |
| OTU48   | 4         | Bacteroidetes  | Prevotellaceae      | <i>Prevotella</i>            | 0.00988 * ↓                 | 0.00044 * ↓               | 0.00044 * ↓                |
| OTU146  | 5         | Proteobacteria | Sutterellaceae      | <i>Sutterella</i>            | 0.00127 * ↓                 | 0.01912 * ↓               | 0.00088 * ↓                |
| OTU152  | 5         | Bacteroidetes  | Rikenellaceae       | <i>Alistipes</i>             | 0.08402                     | 0.00044 * ↓               | 0.00044 * ↓                |
| OTU3    | 5         | Proteobacteria | Enterobacteriaceae  | <i>Escherichia/Shigella</i>  | 0.35596                     | 0.00464 * ↓               | 0.0018 * ↓                 |
| OTU559  | 5         | Synergistetes  | Synergistaceae      | <i>Cloacibacillus</i>        | 0.94339                     | 0.00018 * ↓               | 0.00037 * ↓                |
| OTU129  | 6         | Bacteroidetes  | Porphyromonadaceae  | <i>Butyricimonas</i>         | 0.00226 * ↓                 | 0.00018 * ↓               | 0.00044 * ↓                |
| OTU28   | 6         | Fusobacteria   | Fusobacteriaceae    | <i>Fusobacterium</i>         | 0.40743                     | 0.00018 * ↓               | 0.00044 * ↓                |

| OUT_ID | CAG group | Phylum         | Family                | Genus                     | b10d to 00d( $P^a$ - value) | 00d to 10d( $P^b$ -value) | b10d to 10d( $P^c$ -value) |
|--------|-----------|----------------|-----------------------|---------------------------|-----------------------------|---------------------------|----------------------------|
| OTU217 | 6         | Bacteroidetes  | Porphyromonadaceae    | <i>Odoribacter</i>        | 0.10243                     | 0.00096 * ↓               | 0.00096 * ↓                |
| OTU140 | 6         | Bacteroidetes  | Porphyromonadaceae    | <i>Parabacteroides</i>    | 0.0005 * ↓                  | 0.00044 * ↓               | 0.00044 * ↓                |
| OTU332 | 6         | Bacteroidetes  | Porphyromonadaceae    | <i>Butyricimonas</i>      | 0.00044 * ↓                 | 0.00098 * ↓               | 0.00044 * ↓                |
| OTU13  | 7         | Bacteroidetes  | Porphyromonadaceae    |                           | 0.04947 * ↑                 | 0.00088 * ↓               | 0.00247 * ↓                |
| OTU186 | 7         | Firmicutes     | Erysipelotrichaceae   | <i>Sharpea</i>            | 0.72256                     | 0.00044 * ↓               | 0.00037 * ↓                |
| OTU369 | 7         | Firmicutes     |                       |                           | 0.61915                     | 0.00018 * ↓               | 0.00018 * ↓                |
| OTU142 | 7         | Bacteroidetes  | Porphyromonadaceae    |                           | 0.87672                     | 0.00009 * ↓               | 0.00009 * ↓                |
| OTU174 | 7         | Bacteroidetes  | Porphyromonadaceae    |                           | 0.17729                     | 0.00018 * ↓               | 0.00066 * ↓                |
| OTU22  | 7         | Bacteroidetes  | Porphyromonadaceae    |                           | 0.61915                     | 0.00066 * ↓               | 0.00066 * ↓                |
| OTU2   | 7         | Fusobacteria   | Fusobacteriaceae      | <i>Fusobacterium</i>      | 0.00085 * ↓                 | 0.00044 * ↓               | 0.00044 * ↓                |
| OTU42  | 7         | Bacteroidetes  | Porphyromonadaceae    |                           | 0.24614                     | 0.00066 * ↓               | 0.00066 * ↓                |
| OTU17  | 8         | Firmicutes     | Ruminococcaceae       |                           | 0.14879                     | 0.00126 * ↓               | 0.01122 * ↓                |
| OTU75  | 8         | Bacteroidetes  | Porphyromonadaceae    |                           | 0.56949                     | 0.00066 * ↓               | 0.00018 * ↓                |
| OTU112 | 9         | Firmicutes     | Peptostreptococcaceae | <i>Peptostreptococcus</i> | 0.00018 * ↓                 | 0.25000                   | 0.00018 * ↓                |
| OTU424 | 9         | Proteobacteria | Sutterellaceae        | <i>Sutterella</i>         | 0.0008 * ↓                  | 0.03906 * ↓               | 0.0008 * ↓                 |
| OTU139 | 9         | Bacteroidetes  | Porphyromonadaceae    | <i>Falsiporphyromonas</i> | 0.0008 * ↓                  | 0.0625                    | 0.0008 * ↓                 |
| OTU79  | 9         | Bacteroidetes  | Bacteroidaceae        | <i>Bacteroides</i>        | 0.0034 * ↓                  | 0.04947 * ↓               | 0.00088 * ↓                |
| OTU8   | 9         | Bacteroidetes  | Prevotellaceae        | <i>Prevotella</i>         | 0.0021 * ↓                  | 0.30879                   | 0.0021 * ↓                 |
| OTU110 | 10        | Firmicutes     | Lachnospiraceae       |                           | 0.00214 * ↑                 | 0.03516 * ↓               | 0.01075 * ↑                |
| OTU187 | 10        | Firmicutes     |                       |                           | 0.00037 * ↑                 | 0.00641 * ↓               | 0.12305                    |
| OTU276 | 10        | Bacteroidetes  | Prevotellaceae        |                           | 0.00037 * ↑                 | 0.11774                   | 0.49219                    |
| OTU221 | 10        | Firmicutes     | Erysipelotrichaceae   | <i>Turicibacter</i>       | 0.00018 * ↑                 | 0.00018 * ↓               | 0.81250                    |
| OTU258 | 10        | Proteobacteria | Campylobacteraceae    | <i>Campylobacter</i>      | 0.00406 * ↑                 | 0.00159 * ↓               | 0.04187 * ↓                |

a: OTUs that were significantly changed between b10d and 00d. ↑ significantly increased than b10d, ↓ significantly decreased.

b: OTUs that were significantly changed between 00d and 10d. ↑ significantly increased than 00d, ↓ significantly decreased.

c: OTUs that were significantly changed between b10d and 10d. ↑ significantly increased than b10d, ↓ significantly decreased.

**Supplementary Table 5. The 12 most prevalent OTUs identified in this study**

| OUT ID    | Phylum         | Genus                           | Proportion in total sequences (%) |
|-----------|----------------|---------------------------------|-----------------------------------|
| OTU7      | Bacteroidetes  | Prevotella                      | 3.545%                            |
| OTU21     | Bacteroidetes  | Prevotella                      | 2.347%                            |
| OTU10     | Bacteroidetes  | unclassified_Porphyrimonadaceae | 2.571%                            |
| OTU35     | Bacteroidetes  | unclassified_Bacteroidetes      | 0.412%                            |
| OTU6      | Firmicutes     | Phascolarctobacterium           | 2.231%                            |
| OTU40     | Firmicutes     | unclassified_Ruminococcaceae    | 1.163%                            |
| OTU43     | Firmicutes     | unclassified_Ruminococcaceae    | 0.294%                            |
| OTU33     | Firmicutes     | unclassified_Clostridiales      | 0.826%                            |
| OTU15     | Firmicutes     | unclassified_bacteria           | 0.879%                            |
| OTU134    | Firmicutes     | Butyricoccus                    | 0.106%                            |
| OTU18     | Firmicutes     | Blautia                         | 0.870%                            |
| OTU26     | Actinobacteria | Collinsella                     | 0.546%                            |
| Core OTUs |                |                                 | 15.79%                            |
